## STUDY PROTOCOL

# Integrating physiotherapy into primary care models: A scoping review protocol

Nathaniel Saddy<sup>1</sup>✉, Aamir Aboosally<sup>1</sup>✉, Jordan Aslanidis<sup>1</sup>✉, Anthony Beilin<sup>1</sup>✉, Jessica da Silva Schezar<sup>1</sup>✉, Jordan Miller<sup>1‡</sup>, Andrews K. Tawiah<sup>2‡\*</sup>

**1** School of Rehabilitation Therapy, Faculty of Health Sciences, Queen's University, Kingston, Ontario, Canada, **2** School of Physical Therapy, Faculty of Health Sciences, Western University, London, Ontario, Canada

✉ These authors contributed equally to this work.

‡ JM and AT are joint senior authors.

\* [andrews.tawiah@uwo.ca](mailto:andrews.tawiah@uwo.ca)

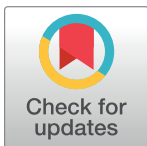

## Abstract

### Introduction

Physiotherapists (PTs) working in primary care settings within an interprofessional team can lead to favourable health outcomes and decreased burden on the healthcare system.

Although PT models of care are important to primary care delivery, there is a lack of knowledge and evidence on the characteristics of these models of care, the differences and similarities between the models, and the barriers and facilitators to implementing these models.

This scoping review protocol aims to fill this knowledge gap by synthesizing the evidence and characteristics of models of care that integrate physiotherapists within primary care teams, mapping the similarities and differences, and describing barriers and facilitators to implementing models of care that integrate physiotherapists within primary care teams.

### Methods

The scoping review is based on the Joanne Briggs Institute (JBI) framework. It is reported according to the Preferred Reporting Items for Systematic Reviews and Meta-Analyses extension for Scoping Reviews (PRISMA-ScR). A comprehensive search strategy will be used to find relevant papers in six databases: OVID MEDLINE, PubMed, Embase, CINAHL, Web of Science, and Scopus. Grey literature will be searched through OpenGrey, Theses Global, ProQuest Dissertation, and Google Scholar. Quantitative and qualitative study designs will be included, with two reviewers independently selecting each article on Covi-dence. Data will be extracted using a pre-piloted data extraction sheet and synthesized narratively to identify themes and patterns.

### Discussion

This scoping review will synthesize the evidence on models of care that integrate physiotherapists within primary care teams. It will provide evidence to inform the implementation of these models of care and identify research gaps that need to be addressed. The protocol is registered on Open Science Framework registries at <https://osf.io/kh83r/>.

## OPEN ACCESS

**Citation:** Saddy N, Aboosally A, Aslanidis J, Beilin A, da Silva Schezar J, Miller J, et al. (2024) Integrating physiotherapy into primary care models: A scoping review protocol. PLoS ONE 19(12): e0308023. <https://doi.org/10.1371/journal.pone.0308023>

**Editor:** Anthony Demont, National Institute of Health and Medical Research: INSERM, FRANCE

**Received:** July 21, 2024

**Accepted:** November 12, 2024

**Published:** December 5, 2024

**Copyright:** © 2024 Saddy et al. This is an open access article distributed under the terms of the [Creative Commons Attribution License](https://creativecommons.org/licenses/by/4.0/), which permits unrestricted use, distribution, and reproduction in any medium, provided the original author and source are credited.

**Data Availability Statement:** No datasets were generated or analysed during the current study. All relevant data from this study will be made available upon study completion.

**Funding:** The author(s) received no specific funding for this work.

**Competing interests:** The authors have declared that no competing interests exist.

## Introduction

According to the World Health Organization, primary health care is a whole of society approach that aims to maximize the level and distribution of health and well-being [1]. Primary Health care comprises three components 1) primary care and essential public health functions as the core of integrated health services 2) multisectoral policy and action 3) empowered people and communities [1]. Primary care models are usually described as the first-contact service for a patient, and the models are built on an interprofessional holistic approach aiming for patient-centred care [2]. In a seminal article by Barbara Starfield, primary care is described based on four attributes known as the “four C’s”: First contact, Continuity of care, Comprehensiveness, and Coordination of care [3, 4]. These attributes have been expanded upon through a multi-stakeholder consensus process to formulate seven shared principles of primary care: 1) Person centered 2) Continuous 3) Comprehensive and equitable 4) Team-based and collaborative 5) Coordinated and integrated 6) Accessible 7) High value care [5]. The principle of team-based and collaborative practice highlights the role of individuals and families as essential members of the primary care team, working alongside diverse healthcare professionals who operate at the top of their expertise. By fostering collaboration among physicians, nurses, medical assistants, receptionists, social workers, nutritionists, physiotherapists, occupational therapists and pharmacist, this team-based approach enhances patient care and helps reduce burnout, promoting a more fulfilling practice environment for healthcare providers [5]. There is evidence that strong primary care, regardless of whether it is delivered by a primary care physician or a team of health professionals, can prevent illness, improve health outcomes, and promote a more equitable distribution of healthcare to the population compared to a specialty care model [6].

Previous systematic reviews indicate that interprofessional care teams significantly improve access to primary care by allowing a broader range of health professionals to manage patient needs and enhance overall care coordination [7–9]. These studies show that interprofessional care teams are particularly effective in managing complex cases, such as cardiovascular and chronic disease patients, by using the expertise of each professional at the top of their license, which helps meet diverse patient needs more efficiently [7–9]. Physiotherapists (PTs) can prevent, assess, and treat injuries, pain, diseases or disorders and their impact on function, movement, and overall health [10]. PTs are competent to practice independently and as part of an interprofessional team from primary to tertiary care. These competencies allow PTs to effectively be part of a team-based approach, an ability that is essential in primary health care models focusing on patient-centred care. Evidence suggests that multiple PT interventions are beneficial for treating multi-system conditions often seen in primary care. PTs have in-depth knowledge of musculoskeletal conditions, chronic pain management, and cardiorespiratory and neurological conditions, and these conditions are the areas of practice most commonly reported by PTs working in primary care [11]. PT services have demonstrated effectiveness in supporting people with several chronic conditions, including providing self-management support, activity counselling, and exercise prescription [11]. Recent studies found that physiotherapy could provide better outcomes in terms of disability, quality of life, and healthcare costs compared to primary physician-led medical care for patients with musculoskeletal disorders but not for pain outcomes [12–14]. These studies found that PT models in primary care provided equal or better outcomes than usual care in primary care settings. However, these studies focused only on musculoskeletal (MSK) disorders.

The call for PTs in primary care has become more robust due to the challenges with access to primary care in multiple countries. Contributors to the lack of primary care access include staff shortages, service inequality by geographic regions, inefficient models of care that require

referrals for certain primary care professionals, preparedness of healthcare providers, practitioner workload, and financial constraints [15]. In Canada, over 6.5 million people do not have access to primary care providers; this is 14.4% of the Canadian population [16], which is expected to grow. This has led to calls for interprofessional team-based models of primary care with physicians, nurses, physiotherapists, social workers, nutritionist and pharmacist as core members of the team. However, there is a lack of synthesized evidence on the models of care that integrate physiotherapists within primary care.

This scoping review protocol aims to fill this evidence gap by examining the evidence on the primary care models that integrate physiotherapists that have been implemented worldwide. This scoping review will identify and describe the characteristics of the models of care, mapping out the similarities and differences between the models. Further, this scoping review will identify the types of evidence available on models of primary care that integrate physiotherapists, which will help identify where evidence exists to inform implementation and where important research gaps need to be addressed. Finally, it will synthesize evidence barriers and facilitators to the implementation of primary care models that involve the integration of physiotherapists within primary care models to provide essential evidence to support the development of implementation processes for team-based models of primary care that include physiotherapists.

## Review questions

1. What are the types of evidence available and gaps in evidence available related to primary care models that integrate physiotherapists within primary care teams?
2. What are the characteristics of primary care models that integrate physiotherapists and what are the similarities and differences between these primary care models?
3. What are the barriers and facilitators to implementing primary care delivery models that integrate physiotherapists within primary care teams?

## Methods

This scoping review will follow the Joanna Briggs Institute (JBI) framework for scoping reviews [17], following updated methodological guidance for the conduct of scoping reviews, best practice guidance and reporting for the development of scoping review protocols and recommendations for the extraction, analysis of presentation of results in scoping reviews [18,19]. A scoping was selected as the best method to identify the gaps in literature and summarize the existing evidence. The protocol is reported in alignment with the Preferred Reporting Items for Systematic Reviews and Meta-Analyses extension for Scoping Reviews (PRISMA-ScR) [20]. A completed PRISMA-ScR checklist is provided in [S1 Appendix](#). The protocol is registered on Open Science Framework registries at <https://osf.io/kh83r/>.

## Inclusion and exclusion criteria

The inclusion and exclusion criteria were designed based on the participants, concept, and context (PCC) framework described by the JBI Scoping Methodology Group [19]. Given that the focus of this scoping review is on models of health service delivery, participants were determined to be not a relevant inclusion criterion. The inclusion and exclusion criteria for this scoping review are presented in [Table 1](#). The inclusion and exclusion criteria were designed to identify research related to the concept of interest (models of primary care that integrate

**Table 1. Inclusion and exclusion criteria.**

| Inclusion Criteria                                                                                                                                                                                                                                                                                                                                                                                                                                                                                                                                                                                                                                                                                                                                                   | Exclusion Criteria                                                                                                                                                                                                                                                                                                                                                                                                                                                                                                                             |
|----------------------------------------------------------------------------------------------------------------------------------------------------------------------------------------------------------------------------------------------------------------------------------------------------------------------------------------------------------------------------------------------------------------------------------------------------------------------------------------------------------------------------------------------------------------------------------------------------------------------------------------------------------------------------------------------------------------------------------------------------------------------|------------------------------------------------------------------------------------------------------------------------------------------------------------------------------------------------------------------------------------------------------------------------------------------------------------------------------------------------------------------------------------------------------------------------------------------------------------------------------------------------------------------------------------------------|
| The included studies will provide evidence of a model of care. As defined by the World Health Organization (WHO) [18].”                                                                                                                                                                                                                                                                                                                                                                                                                                                                                                                                                                                                                                              | Studies that do not provide evidence on a model of care would be excluded. For example, research carried out in a primary care setting but aiming to assess the outcomes of a specific intervention (e.g., a medication) rather than a model of care would be excluded. A second example is research carried out in primary care that focuses on testing the psychometric or diagnostic properties of an assessment tool for a specific condition, which would be excluded.                                                                    |
| A model of <b>primary care</b> (public or private). Primary care will be defined using Epperly’s shared principles of primary care, with emphasis on the following principles [5]: <ul style="list-style-type: none"> <li>i. continuous (or longitudinal) care</li> <li>ii. comprehensive care (the place in the health system where the average person turns for the majority of their routine healthcare needs)</li> <li>iii. Team-based and collaborative care (at least one other health profession involved in addition to the physiotherapist e.g., physicians, nurses, social workers, nutritionists, occupational therapists and pharmacists)</li> <li>iv. Accessible care (a setting where healthcare can be accessed directly without referral)</li> </ul> | Studies of a model of care that does not meet the definition or shared principles of primary care identified. For example, an emergency department does not typically offer longitudinal or comprehensive care, although it often includes interprofessional teams and is accessible as a ‘first-contact’ setting in most health systems. A private physiotherapy clinic may provide direct access and sometimes longitudinal care but does not often offer comprehensive health services that meet most of the average person’s health needs. |
| Included studies will provide evidence on a primary care model involving a licensed or registered <b>physiotherapist</b> .                                                                                                                                                                                                                                                                                                                                                                                                                                                                                                                                                                                                                                           | Studies on primary care models that do not include a physiotherapist.                                                                                                                                                                                                                                                                                                                                                                                                                                                                          |

<https://doi.org/10.1371/journal.pone.0308023.t001>

physiotherapists within primary care teams) and the context (primary care settings anywhere in the world).

## Information sources

A literature search will be completed across six databases: OVID MEDLINE, PubMed, Embase, CINAHL, Web of Science, and Scopus. Grey literature will also be searched through Web of Science, OpenGrey, Theses Global, ProQuest Dissertation, Google Scholar, and central physiotherapy professional and organizational websites. Quantitative and qualitative study designs, primary research, and systematic reviews will all be included in the scoping review.

## Data management

Articles identified by the search will be imported and stored in COVIDENCE. The program will automatically remove duplicates. Title/abstract and full-text screening will be completed through COVIDENCE, and full texts will be stored within the program to allow for extraction. During the screening process, two reviewers will select reasons excluding papers, which will be tracked in Covidence to generate a report that will be present in the final abstract.

## Search strategy

The search strategy aims to identify academic and grey literature with findings that will help further our understanding of the evidence on primary care models of health service delivery that involve the integration of physiotherapists within primary care teams worldwide. One research librarian within the Health Sciences Faculty at Queens University was consulted to assist with the creation of this search strategy. A preliminary search was conducted on OVID MEDLINE using our *concept* and *context*: “Primary Care” and “Physiotherapist” as key terms,

**Table 2. Keywords used in the search strategy.**

| “Physiotherapy” descriptors       | “Primary Care” descriptors                                                                                                                                                                                                           |
|-----------------------------------|--------------------------------------------------------------------------------------------------------------------------------------------------------------------------------------------------------------------------------------|
| Physiotherap*<br>Physical Therap* | Primary care, Primary health care, Primary Medical Care, Primary Care Model, Patient Care Team, Family Health Team, community health center, patient medical home, patient’s medical home patient centered medical home, health home |

<https://doi.org/10.1371/journal.pone.0308023.t002>

along with relevant synonyms. We conceptualize “primary care” as the setting and processes in the health system that supports first-contact, accessible, continued, comprehensive and coordinated patient-focused care [1,3,5].

For the purposes of our inclusion criteria, we differentiate this from primary health care, which is a whole-of-society approach to health that aims to maximize the level and distribution of health and well-being through three components: primary care, essential public health functions, policy and action, and empower people and communities [1]. However, we acknowledge that these terms are often used synonymously in the literature and, therefore, have included “primary health care” as a synonymous search term to ensure we don’t miss relevant articles. Additional terms such as “First Contact” and “Advanced Practice” were incorporated to capture different representations of the “Primary Care” concept. Additional keywords were derived from the abstracts and titles of relevant studies from this preliminary search. These keywords are listed below in Table 2. Using these keywords and medical subject headings, six databases will be searched: OVID MEDLINE, PubMed, Embase, CINAHL, Web of Science, and Scopus. The search strategy will be modified for each unique database based on given programs ability to expand the suggested keywords.

All relevant literature published between 2003–Current in English and French will be considered in the search. These criteria were chosen based on the rationale of including the two main languages in the research team’s residing country (Canada) and attempting to include a broad range of studies that accommodate the team’s resources. The date criteria were selected because primary care models have undergone significant reform within the last decade in Canada and worldwide [21]. Therefore, the literature before 2003 may be scarcer and less relevant than recent studies.

A sample search strategy was conducted on July 2, 2024. The search strategy will be limited to the title of each paper within the database as combinations of these keywords encompass broad results. As per the JBI search strategy recommendations, the reference lists of all identified articles will also be screened to find any additional studies related to the research question. Finally, a grey literature search will also be conducted to capture information about our research question that is not represented in existing publications. Databases such as Web of Science, OpenGrey, Theses Global, ProQuest Dissertation, and Google Scholar will all be searched using a combination of the mentioned keywords. Finally, the websites of major professional and national physiotherapy organizations will be explored for further documentation of PT models of care in primary health settings. The full search strategy is provided in [S2 Appendix](#).

## Study selection

Four members of the research team will take part in the selection process. Each article will have two reviewers independently review the titles and abstracts via COVIDENCE. Screening and eligibility for further review will be determined based on whether the articles presented meet the inclusion criteria. Articles will be included in the full-text review if both reviewers agree that they meet or may meet the eligibility based on the title and abstract. Articles will be

Table 3. Example data extraction form.

| Study title | Year | Country | Research question or objective | Study Design | Setting | Patient sample characteristics | Characteristics of the model of care | Facilitators | Barriers | Findings |
|-------------|------|---------|--------------------------------|--------------|---------|--------------------------------|--------------------------------------|--------------|----------|----------|
|             |      |         |                                |              |         |                                |                                      |              |          |          |
|             |      |         |                                |              |         |                                |                                      |              |          |          |

<https://doi.org/10.1371/journal.pone.0308023.t003>

excluded if both reviewers agree, based on the title and abstract, that the article does not meet the inclusion criteria. Articles identified as potentially meeting the inclusion criteria will undergo a full-text review, using two independent reviewers to agree on inclusion or exclusion in the scoping review. Any disagreements at either the title and abstract or full-text review phases will be discussed between the two independent reviewers with the goal of reaching a consensus decision. A third reviewer will be consulted to resolve the disagreement if an agreement is not reached. Whenever an article is excluded (in the title/abstract review or full text review), rationale will be provided through COVIDENCE and reported. A narrative and flow diagram aligned with the PRISMA-ScR guidance will summarize the study selection process.

### Data extraction

Two independent reviewers will extract Data from the articles in the scoping review using a data extraction tool developed and pre-piloted by the review team. Any disagreements arising between the reviewers extracting the data will be resolved through discussion or consultation with an additional reviewer if needed. The data extracted will include details about the study design and methods, characteristics of the primary care model, context, participants, outcomes (if relevant), barriers and facilitators to implementation (if relevant), and other key findings relevant to the review questions.

Table 3 includes a draft extraction form. The draft data extraction tool has been pilot-tested using a preliminary search and revised based on its usability. The data extraction form will be modified as necessary throughout the extraction process from each included article. Any modifications made will be reported in the scoping review. Authors of papers will be contacted to request missing or additional data, where required.

### Data analysis and presentation

For objective 1, the objectives/questions, design, methods, and findings of each included article will be mapped and reported using a table format that includes columns for study design, study objectives/questions, population, outcomes (if relevant), and key findings. A narrative synthesis will accompany the tabulated results. The question/objectives and findings will be critically analyzed to identify the types of evidence available to guide the implementation of models of primary care that include physiotherapists within primary care teams and evidence gaps that need to be addressed through further research. This critical analysis will be reported narratively.

For objective 2, characteristics of the primary care models that integrate physiotherapists within primary care teams will be reported in a table format. The characteristics will be analyzed to identify similarities and differences across the models of care identified and this analysis will be presented using a narrative synthesis to accompany the tabular results.

For objective 3, barriers and facilitators to implementing primary care models that integrate physiotherapists extracted from studies that investigate barriers and facilitators will be analyzed using directed content analysis using the revised Consolidated Framework for Implementation Research (CFIR) [22]. Results will be presented diagrammatically with an



accompanying narrative synthesis. This analysis aims to identify factors influencing the implementation of primary care models that integrate physiotherapists within primary care teams [19].

## Discussion

This scoping review will outline the existing literature on primary care models that involve the integration of physiotherapists within primary care teams. The findings will synthesize evidence available to guide the implementation of models of primary care that involve the integration of physiotherapists and highlight gaps in evidence that need to be addressed. The findings will also include a description of the characteristics of the models of care that involve the integration of physiotherapists in primary care, with an analysis of similarities and differences across models of care. Finally, the review will identify barriers and facilitators to implementing models of care that involve the integration of physiotherapists within primary care teams, which is anticipated to provide important evidence to inform the implementation of similar models of care in the future. The findings related to each of the three objectives will provide insight into models of team-based primary care that leverage the expertise of physiotherapists, which is gaining attention worldwide.

## Supporting information

**S1 Appendix. Preferred reporting items for systematic review and meta-analysis extension for scoping review.**

(DOCX)

**S2 Appendix. Search strategy.**

(DOCX)

## Author Contributions

**Conceptualization:** Nathaniel Saddy, Aamir Aboosally, Jordan Aslanidis, Anthony Beilin, Jessica da Silva Schezar, Jordan Miller, Andrews K. Tawiah.

**Formal analysis:** Nathaniel Saddy, Aamir Aboosally, Jordan Aslanidis, Anthony Beilin, Jessica da Silva Schezar.

**Methodology:** Aamir Aboosally, Andrews K. Tawiah.

**Project administration:** Andrews K. Tawiah.

**Supervision:** Jordan Miller, Andrews K. Tawiah.

**Writing – original draft:** Nathaniel Saddy, Aamir Aboosally, Jordan Aslanidis, Anthony Beilin, Jessica da Silva Schezar.

**Writing – review & editing:** Nathaniel Saddy, Aamir Aboosally, Jordan Aslanidis, Anthony Beilin, Jessica da Silva Schezar, Jordan Miller, Andrews K. Tawiah.

## References

1. World Health Organization. A vision for primary health care in the 21st century [Internet]. [www.who.int](http://www.who.int). Available from: <https://www.who.int/publications/item/WHO-HIS-SDS-2018>. 15
2. Dufour SP, Lucy SD, Brown JB. Understanding Physiotherapists' Roles in Ontario Primary Health Care Teams. *Physiotherapy Canada*. 2014; 66(3):234–242. <https://doi.org/10.3138/ptc.2013-22> PMID: 25125776

3. Starfield B. Primary care and health. In: Isaacs SL, Knickman JR, editors. *Generalist medicine and the U.S. health system*. San Francisco, CA: Jossey-Bass; 1991. pp. 187–96.
4. Starfield B. *Primary care. Balancing health needs, services and technology*. New York, NY: Oxford University Press; 1998
5. Epperly T, Bechtel C, Sweeney R, Greiner A, Grumbach K, Schilz J, et al. The Shared Principles of Primary Care: A Multistakeholder Initiative to Find a Common Voice. *Family Medicine* [Internet]. 2019 Feb 8; 51(2):179–84. Available from: <https://journals.stfm.org/media/2051/epperly-2018-0288.pdf> <https://doi.org/10.22454/FamMed.2019.925587> PMID: 30736044
6. Starfield B, Shi L, Macinko J. Contribution of primary care to health systems and health. *Milbank Q*. 2005; 83(3):457–502. <https://doi.org/10.1111/j.1468-0009.2005.00409.x> PMID: 16202000
7. Bouton C, Journeaux M, Jourdain M, Angibaud M, Huon JF, Rat C. Interprofessional collaboration in primary care: what effect on patient health? A systematic literature review. *BMC Primary Care*. 2023; 29; 24(1):253. <https://doi.org/10.1186/s12875-023-02189-0> PMID: 38031014
8. Horrocks S, Anderson E, Salisbury C. Systematic review of whether nurse practitioners working in primary care can provide equivalent care to doctors. *BMJ*. 2002; 6; 324(7341):819–23. <https://doi.org/10.1136/bmj.324.7341.819> PMID: 11934775
9. Lukewich J, Martin-Misener R, Norful AA, Poitras ME, Bryant-Lukosius D, Asghari S, Marshall EG, Mathews M, Swab M, Ryan D, Tranmer J. Effectiveness of registered nurses on patient outcomes in primary care: a systematic review. *BMC health services research*. 2022; 3; 22(1):740.
10. NPAG—Competency Profile for Physiotherapists in Canada. College of Physiotherapists of Ontario. 2017. Accessed August 21, 2023. [https://www.collegept.org/docs/default-source/defaultdocumentlibrary/essentialcompetencyprofile2009.pdf?sfvrsn=614fc9a1\\_2](https://www.collegept.org/docs/default-source/defaultdocumentlibrary/essentialcompetencyprofile2009.pdf?sfvrsn=614fc9a1_2).
11. Vader K, Ashcroft R, Bath B, et al. Physiotherapy Practice in Primary Health Care: A Survey of Physiotherapists in Team-Based Primary Care Organizations in Ontario. *Physiother Can*. 2022; 74(1):86–94. <https://doi.org/10.3138/ptc-2020-0060> PMID: 35185252
12. Samsson KS, Bernhardsson S, Larsson MEH. Perceived quality of physiotherapist-led orthopedic triage compared with standard practice in primary care: a randomized controlled trial. *BMC Musculoskeletal Disorders*. 2016; 17(1). <https://doi.org/10.1186/s12891-016-1112-x> PMID: 27286829
13. Demont A, Bourmaud A, Kechichian A, Desmeules F. The of direct access physiotherapy compared to primary care physician led usual care for patients with musculoskeletal disorders: a systematic review of the literature. *Disability and Rehabilitation*. 2019 Oct 11; 43(12):1637–48. <https://doi.org/10.1080/09638288.2019.1674388>
14. Vader K, Donnelly C, French SD, et al. Implementing a new physiotherapist-led primary care model for low back pain: a qualitative study of patient and primary care team perspectives. *BMC Primary Care*. 2022; 23(1). <https://doi.org/10.1186/s12875-022-01817-5> PMID: 35948876
15. Boerma W, Bourgueil Yann Y, Cartier T, Hasvold T, Hutchinson A, Kringos D, et al. Overview and future challenges for primary care [Internet]. U.S. National Library of Medicine; 2015. Accessed on May 18, 2024. Available from: <https://www.ncbi.nlm.nih.gov/books/NBK458729/>
16. Government of Canada SC. Access to health care [Internet]. <https://www150.statcan.gc.ca>. 2023. Accessed May 12, 2024. Available from: <https://www150.statcan.gc.ca/n1/pub/82-570-x/2023001/section3-eng.htm>
17. Aromataris E, Lockwood C, Porritt K, Pilla B, Jordan Z, editors. *JBIM Manual for Evidence Synth*; 2024. Available from <https://doi.org/10.46658/JBIMES-24-01>
18. Peters MDJ, Godfrey C, McInerney P, et al. Best practice guidance and reporting items for the development of scoping review protocols. *JBIM Evidence Synth*. 2022; 20(4):953–968. <https://doi.org/10.11124/JBIES-21-00242> PMID: 35102103
19. Pollock D, Peters MDJ, Khalil H, et al. Recommendations for the extraction, analysis, and presentation of results in scoping reviews. *JBIM Evid Synth*. 2023 Mar 1; 21(3):520–532. <https://doi.org/10.11124/JBIES-22-00123> PMID: 36081365
20. Tricco AC, Lillie E, Zarin W, et al. PRISMA Extension for Scoping Reviews (PRISMA-ScR): Checklist and Explanation. *Ann Intern Med*. 2018; 169(7):467–473. <https://doi.org/10.7326/M18-0850> PMID: 30178033
21. Operational framework for primary health care: transforming vision into action. Geneva: World Health Organization and the United Nations Children’s Fund (UNICEF), 2020. Available from <https://www.who.int/publications/i/item/9789240017832>
22. Damschroder L.J., Aron D.C., Keith R.E. et al. Fostering implementation of health services research findings into practice: a consolidated framework for advancing implementation science. *Implementation Sci* 4, 50 (2009). <https://doi.org/10.1186/1748-5908-4-50>
